# Supplementary material for: What is the difference between comprehensive and selective primary health care? Evidence from a five-year longitudinal realist case study in South Australia
Source: PubMed Central journal article supplement — BMJ Open. 2017 Apr 28;7(4):e015271. doi: 10.1136/bmjopen-2016-015271 (PMC5719653; doi:10.1136/bmjopen-2016-015271), 2017-04-28
Supplement: bmjopen-2016-015271.draft_revisions.pdf [file bmjopen-2016-015271.draft_revisions.pdf]

# BMJ Open

## What's the difference between comprehensive and selective primary health care? Evidence from an empirical study in South Australia

|                                 |                                                                                                                                                                                                                                                                                                                                                                                                                                    |
|---------------------------------|------------------------------------------------------------------------------------------------------------------------------------------------------------------------------------------------------------------------------------------------------------------------------------------------------------------------------------------------------------------------------------------------------------------------------------|
| Journal:                        | <i>BMJ Open</i>                                                                                                                                                                                                                                                                                                                                                                                                                    |
| Manuscript ID                   | bmjopen-2016-015271                                                                                                                                                                                                                                                                                                                                                                                                                |
| Article Type:                   | Research                                                                                                                                                                                                                                                                                                                                                                                                                           |
| Date Submitted by the Author:   | 23-Nov-2016                                                                                                                                                                                                                                                                                                                                                                                                                        |
| Complete List of Authors:       | Baum, Fran; Flinders University, Southgate Institute for Health, Society and Equity<br>Freeman, Toby; Flinders University, Southgate Institute for Health, Society and Equity<br>Lawless, Angela; Flinders University, Southgate Institute for Health, Society and Equity<br>Labonte, Ronald; University of Ottawa, Epidemiology and Community Medicine<br>Sanders, David; University of the Western Cape, School of Public Health |
| <b>Primary Subject Heading</b>: | Health services research                                                                                                                                                                                                                                                                                                                                                                                                           |
| Secondary Subject Heading:      | Public health                                                                                                                                                                                                                                                                                                                                                                                                                      |
| Keywords:                       | Health policy < HEALTH SERVICES ADMINISTRATION & MANAGEMENT, primary health care, neoliberalism                                                                                                                                                                                                                                                                                                                                    |
|                                 |                                                                                                                                                                                                                                                                                                                                                                                                                                    |

SCHOLARONE™  
Manuscripts

only

1  
2  
3 **What's the difference between comprehensive and selective primary health care?**  
4

5 **Evidence from an empirical study in South Australia**  
6  
7

8  
9 Fran Baum, Southgate Institute for Health, Society, and Equity, Flinders University,  
10 Adelaide, Australia  
11

12  
13 Toby Freeman, Southgate Institute for Health, Society, and Equity, Flinders University,  
14 Adelaide, Australia  
15

16  
17 Angela Lawless, Speech Pathology, Flinders University, Adelaide, Australia  
18

19  
20 Ronald Labonté, Institute of Population Health, University of Ottawa, Ottawa, Canada  
21

22  
23 David Sanders, School of Public Health, University of the Western Cape, Cape Town, South  
24 Africa  
25  
26

27  
28  
29 Corresponding author:  
30

31 Prof. Fran Baum, Southgate Institute for Health, Society, and Equity, Flinders University,  
32

33 GPO Box 2100, Adelaide SA 5001  
34

35  
36 Email: [fran.baum@flinders.edu.au](mailto:fran.baum@flinders.edu.au)  
37

38 Ph: + 61 8 7221 8410  
39  
40  
41

42  
43 Word count: 2,997  
44  
45  
46  
47  
48  
49  
50  
51  
52  
53  
54  
55  
56  
57  
58  
59  
60

## ABSTRACT

### Objectives

Since the Alma Ata Declaration on Primary Health Care (PHC) there has been debate about the advisability of adopting comprehensive or selective PHC. Proponents of the latter argue a more selective approach will enable interim gains while proponents of comprehensive PHC argue it is needed to address underlying causes of ill-health and improve health outcomes sustainably. This study sought to examine the differences in the two forms in practice.

### Methods

This research is based on four case studies of government funded and run PHC services in Adelaide, South Australia. Program logic models were constructed from interviews and workshops. The initial model represented relatively comprehensive service provision in 2010. Subsequent interviews in 2013 permitted construction of a selective PHC logic model following a series of restructuring service changes.

### Results

Comparison of the PHC service logic models before and after restructuring illustrates the changes to the operating context, underlying mechanisms, service qualities, activities, activity outcomes and anticipated community health outcomes. The services moved from focusing on a range of community, group and individual activities to a focus on the management of people with chronic disease. Under the more comprehensive model activities were along a continuum of promotive, preventive, rehabilitative and curative. Under the selective model the focus moved to rehabilitative and curative with very little other activity.

### Conclusion

The study demonstrates the difference between selective and comprehensive approaches to PHC in a rich country setting and is useful in informing debates on PHC especially in the context of the Sustainable Development Goals.

## STRENGTHS AND LIMITATIONS OF THIS STUDY

- This paper provides a clear description of the program logic behind comprehensive primary health by outlining the operating context, underlying mechanisms, the service qualities, the activities, the activity outcomes and the predicted community health outcomes.
- The paper compares this comprehensive model with a selective approach and by examining each aspect of the program logic demonstrates how selective primary health care is much less able to improve population (as opposed to clinical) health outcomes.
- Previous delineations between comprehensive and selective PHC have been limited to short theoretical accounts whereas this study provides a unique empirical examination of differences in the two forms in practice. This difference is crucial and needs to be defined very clearly when health systems are being reoriented to PHC.
- We do not claim that our typification of selective PHC in this study necessarily captures all interpretations (past and present) of this form of PHC.
- The comprehensive model as envisaged by these services was limited by the fact that it did not include extensive advocacy on upstream social determinants of health and, in some cases, relied on publicly funded medical services that were not integrated in the service.

## INTRODUCTION

1  
2  
3 The initial World Health Organisation (WHO) 1978 vision of Primary Health Care (PHC)  
4 was comprehensive, viewing health services as part of a new international economic order  
5 that would benefit all nations especially low income and groups living in disadvantage, that  
6 would encourage democratic participation in health, and help improve social and  
7 environmental contexts that create disease and risks for disease [1]. Health services were to  
8 be multi-disciplinary, attuned to local need, and emphasise disease prevention and health  
9 promotion. This comprehensive vision was overtaken by a pragmatic call for a more selective  
10 approach, albeit originally considered to be temporary until developing countries could afford  
11 a more comprehensive approach, which minimized the broader social change ambitions of  
12 the original vision, marginalised preventive and promotive actions, and emphasized responses  
13 to specific diseases or narrowly-defined health outcomes [2]. Although the WHO  
14 recommitted to PHC in 2008 [3] and the Commission on the Social Determinants of Health  
15 [4] endorsed PHC as the corner stone of a health system and a strategy for taking action on  
16 social determinants of health at a local level, selective PHC has dominated health system  
17 reforms in most low and middle income countries, abetted by growth in vertical (disease-  
18 specific) global health funds [5]. Most empirical work on PHC implementation has come  
19 from low and middle income countries, with few systematic studies of comprehensive PHC  
20 from high income countries. This paper reports on an Australian study which tracked a shift  
21 from comprehensive to selective PHC and has enabled development of a program logic  
22 description of the two forms of PHC. We do not claim that our typification of selective PHC  
23 in this study necessarily captures all interpretations (past and present) of this form of PHC.  
24 Rather, it allows us to articulate the difference between two models in a particular high  
25 income country context when so much discourse about PHC (both within Australia, and more  
26 globally under the post-2015 Sustainable Development Goal of promoting Universal Health  
27 Coverage) does not make the distinction.

## Primary health care in high income countries

In high income countries, the best examples of comprehensive PHC have been community health centres in Canada (<http://www.cachc.ca/>), the USA [6], and Australia [7]. Community health centres are characterised by multi-disciplinary teamwork, a social understanding of health, community participation in management, advocacy for policy changes to address the social determinants of health at higher government levels, and services that cover rehabilitation, treatment, prevention and promotion. These centres have remained marginal within their country health systems, faced opposition from mainstream medicine and struggled to maintain their comprehensiveness.

In Australia, community health centres were the legacy of a 1970s national program and were maintained by state governments including the South Australian government which is the focus of this study. There have been very few studies of whole PHC services. Labonte et al. [8] found that most of the empirical PHC literature focused on “slices” or particular programs, rather than studying the overall service in a systematic way. Our research studied the totality of services in a way not previously reported in the literature [9]. While we didn’t anticipate it at the outset, our five year study (2009-2014) witnessed a series of structural reorganisations and policy changes [10] which undermined the comprehensive nature of our case study services. The aim of this paper is to describe the difference between a comprehensive and selective model of PHC in a high-income country setting.

## METHODS

This paper draws on a five year longitudinal realist [11] case study of PHC services which used program logic modelling to describe the services and their expected outcomes [for

1  
2  
3 details see 12]. This paper draws on a synthesis of our findings to examine the difference  
4  
5 between comprehensive and selective PHC. Our study was conducted with seven PHC  
6  
7 services and this paper draws on data from five state-managed PHC services (the other two  
8  
9 are non-government services and did not experience the changes reported in this paper). The  
10  
11 services are anonymised as A, B, C, D (an Aboriginal health team), and E. Service B  
12  
13 withdrew from further participation in the study in 2012, due to high staff workloads and  
14  
15 significant organisational change. Service E agreed to join as a replacement. Further details  
16  
17 of the services are provided in Table 1. Each case study service adopted a reasonably  
18  
19 comprehensive PHC approach at the onset of the study although A, C, and E did not provide  
20  
21 medical services reflecting the historical opposition of the organised medical profession to  
22  
23 these centres [13]. In 2009 all services had organisational statements which demonstrated  
24  
25 strong commitment to the Alma Ata Declaration principles including an explicit commitment  
26  
27 to social determinants of health and health promotion.  
28  
29  
30  
31  
32  
33  
34  
35  
36  
37  
38  
39  
40  
41  
42  
43  
44  
45  
46  
47  
48  
49  
50  
51  
52  
53  
54  
55  
56  
57  
58  
59  
60

1  
2  
3  
4  
5  
6  
7  
8  
9  
10  
11  
12  
13  
14  
15  
16  
17  
18  
19  
20  
21  
22  
23  
24  
25  
26  
27  
28  
29  
30  
31  
32  
33  
34  
35  
36  
37  
38  
39  
40  
41  
42  
43  
44  
45  
46  
47  
48  
49

Table 1: Characteristics of case study state-managed PHC services: 2010 and 2013

| Service | Budget (p.a.) |                     | Main source of funding | Governance    | Approximate # of staff (FTE) |                           | Range of services                                                                                                                                                                                                                     |                                                                                                                               |
|---------|---------------|---------------------|------------------------|---------------|------------------------------|---------------------------|---------------------------------------------------------------------------------------------------------------------------------------------------------------------------------------------------------------------------------------|-------------------------------------------------------------------------------------------------------------------------------|
|         | 2010          | 2013                |                        |               | 2010                         | 2013                      | 2010                                                                                                                                                                                                                                  | 2013                                                                                                                          |
| A       | \$1.2m        | \$0.5m <sup>1</sup> | SA Health              | State-managed | 16<br>(13.5)                 | 10<br>(8.1)               | Early childhood, health promotion, community development, allied health, chronic condition self-management, mental health, lifestyle advisor                                                                                          | Early childhood                                                                                                               |
| B       | \$1.1m        | \$1.3m <sup>2</sup> | SA Health              | State-managed | 26<br>(20)                   | 28<br>(15.7) <sup>2</sup> | Medical clinic, allied health, early childhood, podiatry, chronic condition self-management, lifestyle advisor, health promotion programs and groups, community development, peer education                                           | Medical clinic, allied health, early childhood, podiatry, chronic condition self-management                                   |
| C       | \$1.7m        | \$1.6m              | SA Health              | State-managed | 36<br>(22)                   | 25<br>(15.3)              | Chronic condition self-management, early childhood, family violence, mental health, supported residential facilities services, community garden, lifestyle advice, health promotion, local initiatives, parenting groups, mindfulness | Chronic condition self-management, early childhood, family violence, mental health, supported residential facilities services |



|   |                  |                  |           |               |                  |                  |                                                                                                                                                                                                    |                                                                                                  |
|---|------------------|------------------|-----------|---------------|------------------|------------------|----------------------------------------------------------------------------------------------------------------------------------------------------------------------------------------------------|--------------------------------------------------------------------------------------------------|
|   |                  |                  |           |               |                  |                  | and meditation groups, healthy ageing                                                                                                                                                              |                                                                                                  |
| D | \$0.5m           | N/A <sup>3</sup> | SA Health | State-managed | 12<br>(10.8)     | N/A <sup>3</sup> | Community lunch program, health promotion groups, 1:1 case management/referral/advocacy, transport, community events                                                                               | Combined into medical clinic, Aboriginal clinical health workers, learning centre                |
| E | N/A <sup>4</sup> | \$1.7m           | SA Health | State-managed | N/A <sup>4</sup> | 21<br>(16.6)     | Early childhood, chronic disease self-management, mental health, antenatal and postnatal support, domestic violence services, healthy ageing, health promotion, community development <sup>4</sup> | Early childhood, chronic disease self-management, mental health, antenatal and postnatal support |

<sup>1</sup> Approximate – budget was combined with another site. Budget for 2 sites was \$1.1m

<sup>2</sup> As of 2011, due to service withdrawing

<sup>3</sup> Service was restructured and merged with another service, cannot calculate a comparison to 2010.

<sup>4</sup> Service joined study in 2012 – staff, budget info not available for 2010, services are as of 2012

### Staff interviews

We interviewed staff in 2009 and 2013. The details of the interviews have been reported elsewhere [14]. In 2013, 63 interviews were conducted with service practitioners and managers in the seven PHC sites, and regional and central health executives.

Interview questions were developed by the research team based on the attributes of PHC and data collected on changes in PHC during 2009-2013, and piloted on two practitioners and one manager from non-participating PHC services. Interviews were audio recorded, transcribed, and de-identified. Ethics approval was received from the Southern Adelaide Clinical Human and Aboriginal Health Research Ethics Committees.

A team approach was taken to thematic analysis, aided by NVivo software. Codes were discussed and revised in team meetings, and four interviews were double-coded or triple-coded, ensuring rigour through constant monitoring of analysis and interpretation [15].

### Program logic models

An overarching model of comprehensive PHC in Australia was constructed in 2010 using a collaborative process [12] and drawing on the models constructed for each service. Following the interviews conducted in 2013 a new program logic model was constructed by the research team reflecting the changes and revealing the more selective nature of the state-managed services.

## FINDINGS

Figures 1 & 2 present the before and after picture of PHC. In Figure 1 the comprehensive nature of the services in 2009-10 is shown according to the operating context, underlying mechanisms, service qualities, activities, activity outcomes and community health outcomes. By 2014 these had changed significantly in the services and these changes are shown in Figure 2 and elaborated on below.

[Insert Figures 1 and 2 about here]

## Context

In 2009-10 the context of the services was reasonably supportive of comprehensive service delivery. By 2014 the context for the services had changed so that their work had little political or bureaucratic support and their mandate changed from being responsive local services to one in which their agenda was centrally driven with a focus on chronic disease management. This changing context partly reflected on-going dispute between the Australian Federal and State governments regarding which authority was responsible for PHC and health promotion, largely in terms of who was to pay for the activities. While the Federal government had introduced regional PHC authorities (first Medicare Locals and then Primary Health Networks) their mandate and their practice were not comprehensive [16] and they did not work with the state-funded PHC services [17].

## Mechanisms

The main difference between the selective and comprehensive model was that the service components had contracted considerably by 2014. Rather than offering services that responded to a wide range of community health issues the service model was reduced to a focus on chronic disease management and some limited early childhood services. Previously the services had responded to a much broader range of health issues including domestic violence, injury prevention and food quality. The new selective model was also inwardly focused whereas the comprehensive model had relied on health workers linking with other sectors, reaching out to the community and, albeit in a limited way, paying some attention to social determinants of health. Most significantly the selective model was based on a biomedical understanding of health with little or no attention to social factors.

## Service qualities

The comprehensive model encouraged individual and community empowerment and responded to community needs. The health professionals also saw that the comprehensive

1  
2  
3 model was holistic, used by those most in need and placed high emphasis on being culturally  
4 respectful. By contrast the selective model paid very little attention to these attributes. The  
5  
6  
7 Aboriginal health workers at Service D felt less able to work in ways that suited the  
8  
9  
10 community, and some staff at the other services felt their service may be less welcoming to  
11  
12 Aboriginal and Torres Strait Islander clients than in the past:

13  
14 “I don't think the centre is particularly safe or friendly for Aboriginal clients. It's just a little  
15  
16 bit more clinical ... we don't have the Aboriginal flags and we don't have the things that  
17  
18 would make Aboriginal people feel especially welcome to this service, unfortunately.”

19  
20  
21 Limits to comprehensiveness reported were that resource limitations meant services had to be  
22  
23 targeted. The Aboriginal health service was open to all Aboriginal people, however. Under  
24  
25 the comprehensive model the aim was a broad response to community health needs which  
26  
27 were identified in consultation with the community. Thus a practitioner spoke of this  
28  
29 engagement:

30  
31  
32 “Community health was very much around the Ottawa Charter and things like that,  
33  
34 about being very accountable to your local community, and a lot of local community  
35  
36 involvement and a lot of local ownership of how the centre operated and what  
37  
38 services the centre provided, and a lot of local initiatives.” (practitioner, Service B)

39  
40  
41  
42  
43 Other comments demonstrated that community advice was no longer valued:

44  
45 “No community involvement whatsoever. The only thing we do have is a client  
46  
47 feedback form” (practitioner, Service C)

48  
49 “... you can't go out and work with the community or plan with the community or  
50  
51 other agencies because it's become that siloed work.” (practitioner, Service A)

1  
2  
3 The selective model had a narrow focus on reducing hospital admissions:  
4

5 “We really are now refocusing [Service A] to the high end chronic conditions that we  
6  
7 feel we can create a service continuum interfacing with the acute sector and really  
8  
9 focusing on hospital avoidance for clients with those conditions.” (regional health  
10  
11 executive)  
12  
13

## 14 15 16 **Service Activities** 17

18  
19 The main difference in service activities was that the selective model focused solely on the  
20  
21 treatment and secondary prevention activities for individuals. Nearly all the focus was on  
22  
23 chronic disease management and the only other services remaining were for children but their  
24  
25 scope had been reduced. The comprehensive model had a wider gaze and saw its mandate as  
26  
27 working with individuals and the community as a whole in a variety of ways as this  
28  
29 comments indicates:  
30  
31

32 “In the past we’ve run a wider scope of programs and groups, so it wasn’t uncommon  
33  
34 to team up with a nurse and do some more preventative lifestyle programs, which we  
35  
36 can’t do anymore.” (practitioner, Service E)  
37  
38

39 Many of the activities lost were of benefit in relation to many diseases. For example activities  
40  
41 that promote social connection are good for mental health and physical health [18] and  
42  
43 exercise is a key component in management of mental health issues such as depression [19]  
44  
45 as well as diabetes. The comprehensive model included a wider range of activities, shown in  
46  
47 Box 1.  
48  
49

### 50 51 52 **Box 1 Activities present in comprehensive but not selective PHC** 53

54  
55 Community Advocacy campaigns including on domestic violence, Aboriginal and Torres  
56  
57 Strait Islander rights and cultural pride  
58  
59  
60

1  
2  
3 Individual advocacy: supporting individuals in quest to gain housing, welfare benefits

4  
5 Support Groups: for domestic violence, men's groups, women's groups, and mothers and  
6  
7 babies groups  
8

9  
10 Community activities: lunches, school and childcare centre engagement

11  
12 Community development: engagement with community members on health issues they are  
13  
14 concerned about

15  
16 Intersectoral actions: membership of regional roundtables, engagement with other sectors on  
17  
18 range of health issues  
19

20  
21 End of Box  
22  
23

24  
25 In 2009 the health professionals reported working with the community in many different  
26  
27 ways, often going out to community sites, but by 2013 institutional support for this activity  
28  
29 had gone:  
30

31  
32 "It's a lot more client-coming-into-the-service-based, rather than going out into the  
33  
34 community ... we're not working with the [adult education school] or the local  
35  
36 childcare centre, whereas probably in 2009 we were stepping outside our doors a little  
37  
38 bit. (practitioner, Service A).  
39

40  
41  
42  
43 The move from a comprehensive to a selective set of activities was summed up by this  
44  
45 nutritionist's comment:  
46

47  
48 "We would visit community groups regularly and be a guest speaker for example. We  
49  
50 would run group programs that were really around increasing personal knowledge and  
51  
52 skills, very hands on practical - like cooking programs. That work has slowly been  
53  
54 whittled out of the role. We would do like a split of time, like 30% of the time would  
55  
56 be client direct, 30% on groups and then 30% would be health promotion and other  
57  
58  
59  
60

1  
2  
3 activities. So it might be networking with a local childcare centre, for example,  
4  
5 helping do menu reviews, supporting community initiatives and really being  
6  
7 responsive to the local community needs. That has turned into now just offering one  
8  
9 on one nutrition work.” (practitioner, Service E)  
10

11  
12 In 2009 the services worked with other sectors, including for example at Service E a series of  
13  
14 roundtables on issues including early childhood development, domestic violence and injury  
15  
16 prevention. By 2014 all that work had ceased. Thus a narrowing down of service activities  
17  
18 typified the changes over the study period.  
19  
20

## 21 22 23 **Activity outcomes**

24  
25  
26  
27 The impact of the changes to the mechanisms and service activities are evident in terms of the  
28  
29 expected activity outcomes. Under the comprehensive model outcomes were expected in  
30  
31 individuals and also for communities (e.g., more supportive environments, increased social  
32  
33 capital). The selective PHC outcomes were limited to improved chronic disease management  
34  
35 and aimed for more planned, managed care and decreased acute, episodic care for chronic  
36  
37 disease, and a reduction in hospital admissions. Thus the activity outcomes are less  
38  
39 ambitious.  
40  
41  
42

## 43 **COMMUNITY HEALTH OUTCOMES**

44  
45 The differences between the models becomes starkest in the likely outcomes. The selective  
46  
47 model is expected to lead to improved chronic disease management for some individuals and  
48  
49 so have negligible population health impact. By contrast the comprehensive model anticipates  
50  
51 improving health and well-being in individuals (including those with chronic disease) and the  
52  
53 community and also to reduce health inequities. Selective PHC leads to a chronic disease  
54  
55 treatment focussed health system with little capacity to prevent disease or promote health.  
56  
57  
58  
59  
60

1  
2  
3 The comprehensive model provides a health system that would make some contribution to  
4  
5 reducing the burden of disease and also promote well-being more generally, although the  
6  
7 model depends on being supported by broader government action on the upstream social  
8  
9 determinants.  
10

## 11 12 13 14 **DISCUSSION**

15  
16 Our findings have shown that while there are similarities between the two models of PHC in  
17  
18 that they are both community-based, involve multi-disciplinary staff and respond to  
19  
20 individuals in need of care, beyond that there are significant differences that mean the  
21  
22 capacity for community health improvement is reduced significantly. This difference is  
23  
24 crucial and needs to be defined very clearly when health systems are being reoriented to  
25  
26 PHC. Previous delineations between comprehensive and selective PHC have been limited to  
27  
28 short theoretical accounts [20 21] whereas this study provides a unique empirical examination  
29  
30 of differences in the two visions in on the ground practice.  
31  
32

33  
34 Chronic disease management is vital given the increasing burden of chronic disease. But it is  
35  
36 short sighted to design a PHC system solely for this purpose. A more comprehensive model  
37  
38 offers many benefits to a community. Community involvement in management and planning  
39  
40 of a health service helps ensure they respond to community need [22]. A focus on prevention  
41  
42 and the promotion of well-being in PHC is an important component of a health system's  
43  
44 capacity to prevent disease. As Rose [23] has demonstrated prevention requires more than a  
45  
46 focus on those already ill, rather making smaller changes across the whole population and  
47  
48 reducing the risk by clinically insignificant amounts adds up to a far greater contribution to  
49  
50 prevention. Thus while selective PHC appears to have an inherent logic in that it focuses on  
51  
52 people with disease making high demands on the health service, its sets the health system up  
53  
54 to run endlessly, like a rat on a wheel, because there is no prospect that it can stem the flow  
55  
56  
57  
58  
59  
60



1  
2  
3 into this disease category. There appears to be nothing in the logic of the selective approach  
4  
5 that suggests it can prevent new cases emerging.  
6

7 We acknowledge that the comprehensive model as envisaged by these services did not  
8  
9 include extensive advocacy on upstream determinants such as income inequity,  
10  
11 unemployment or housing. Thus its claim to be comprehensive was limited by the relative  
12  
13 limited scope of action on social determinants of health. Elsewhere we have detailed the  
14  
15 management and funding pressures that led to a retreat from a more comprehensive model in  
16  
17 South Australia [10]. This retreat was despite the fact that Australian reviews of the health  
18  
19 system have reinforced the importance of PHC and health promotion in particular [24 25].  
20  
21

22 Our models show that the broader socio-political context is crucial in shaping implementation  
23  
24 of PHC. Because comprehensive PHC challenges the powerful dominant bio-medical model  
25  
26 of health, a particularly supportive political context is required for its implementation. In  
27  
28 Australia there has been declining investment in prevention – the spending has dropped from  
29  
30 2.2% to 1.4% [26, p. 255]. In this context comprehensive PHC is unlikely to flourish.  
31  
32

33 Unlike the selective model comprehensive PHC reaches out to people for whom health  
34  
35 services are hard to reach through a range of community development activities [27]. Actions  
36  
37 to address local social determinants of health also seek to create supportive community  
38  
39 environments for health and so promote health for the whole population. The importance of  
40  
41 this continuum of action has long been recognised [28] yet its acceptance and integration in  
42  
43 to health systems is proving very difficult. Baum and Fisher [29] have argued that there are  
44  
45 structural pressures against a social approach to prevention including the inherent  
46  
47 individualism driving political and social thought in many industrialised countries, and the  
48  
49 considerable corporate pressures which exert influences on policy dialogues to keep the focus  
50  
51 on individual behaviours rather than structural factors that drive poor health and health  
52  
53 inequities. These pressures make it even more important to be clear on the different styles of  
54  
55  
56  
57  
58  
59  
60

1  
2  
3 PHC and to specify what constitutes a comprehensive and selective model. The two models  
4  
5 presented in this paper enable others to assess the extent to which their PHC services are  
6  
7 comprehensive and operating in an environment which is supportive of such approaches.  
8  
9

## 10 11 **ACKNOWLEDGEMENTS**

12  
13  
14 We would like to acknowledge the staff of each participating service and thank them for their  
15  
16 time and trust in allowing us to conduct research in partnership with them.  
17  
18

## 19 20 **COMPETING INTERESTS**

21  
22 The authors declare they have no competing interests.  
23  
24  
25

## 26 27 **FUNDING**

28  
29 This research was supported by the National Health and Medical Research Council (grant  
30  
31 number 535041).  
32  
33

## 34 35 **DATA SHARING STATEMENT**

36  
37 No additional data available  
38  
39  
40

## 41 42 **CONTRIBUTORSHIP STATEMENT**

43  
44  
45 FB oversaw the research, led the design of the research, contributed to data collection and  
46  
47 analysis, and led the writing of this journal article. TF and AL contributed to the design of the  
48  
49 research, and contributed to data collection and analysis, and the writing of this journal  
50  
51 article. RL and DS contributed to the design of the research, analysis of findings, and the  
52  
53 writing of this journal article.  
54  
55  
56  
57  
58  
59  
60

## REFERENCES

1. WHO. Declaration of Alma-Ata, International Conference on Primary Health Care, USSR, 6-12 September. Alma Ata: World Health Organization, 1978.
2. Walsh JA, Warren KS. Selective primary health care: An interim strategy for disease control in developing countries. *New England Journal of Medicine* 1979;**301**(18) doi: 10.1056/NEJM197911013011804.
3. WHO. World health report: Primary health care now more than ever. Geneva: WHO, 2008.
4. Commission on Social Determinants of Health. Closing the gap in a generation: Health equity through action on the social determinants of health. Geneva: World Health Organization, 2008.
5. Sanders D, Baum FE, Benos A, Legge D. Revitalising primary healthcare requires an equitable global economic system - now more than ever. *Journal of Epidemiology and Community Health* 2011;**65**(8):661-65 doi: 10.1136/jech.2009.095125.
6. Lefkowitz B. *Community health centres: A movement and the people who made it happen*. Piscataway, NJ: Rutgers University Press, 2007.
7. Baum F. Community health services in Australia. In: Germov J, ed. *Second Opinion*, 5th ed. 5th ed ed. Melbourne, Australia: Oxford University Press, 2013.
8. Labonte R, Sanders D, Baum F, et al. Implementation, effectiveness and political context of comprehensive primary health care: preliminary findings of a global literature review. *Aust. J. Prim. Health* 2008;**14**(3):58-67 doi: 10.1071/PY08037.
9. Labonté R, Sanders D, Packer C, Schaay N. Is the Alma Ata vision of comprehensive primary health care viable? Findings from an international project. *Global Health Action* 2014;**7** doi: 10.3402/gha.v7.24997.
10. Baum F, Freeman T, Sanders D, Labonté R, Lawless A, Javanparast S. Comprehensive primary health care under neo-liberalism in Australia. *Soc. Sci. Med.* 2016;**168**:43-52 doi: <http://dx.doi.org/10.1016/j.socscimed.2016.09.005>.
11. Pawson R, Tilley N. *Realistic Evaluation*. London: Sage, 1997.
12. Lawless A, Freeman T, Bentley M, Baum F, Jolley G. Developing a good practice model to evaluate the effectiveness of comprehensive primary health care in local communities. *BMC Fam. Pract.* 2014;**15**:99 doi: 10.1186/1471-2296-15-99.
13. Raftery J. The social and historical context. In: Baum F, ed. *Health for All: The South Australian Experience*. Adelaide, SA: Wakefield Press, 1995:19-37.
14. Freeman T, Baum F, Lawless A, et al. Revisiting the ability of Australian primary health care services to respond to health inequity. *Aust. J. Prim. Health* 2015;**22**:332-38 doi: <http://dx.doi.org/10.1071/PY14180>.
15. Morse JN, Barrett M, Mayan M, Olson K, Spiers J. Verification strategies for establishing reliability and validity in qualitative research. *Int. J. Qual. Methods* 2002;**1**:13-22 doi: 10.1177/160940690200100202.
16. Javanparast S, Baum F, Freeman T, et al. Lessons from Medicare Locals for Primary Health Networks. *Med. J. Aust.* in press.
17. Javanparast S, Baum F, Barton E, et al. Medicare Local–Local Health Network partnerships in South Australia: lessons for Primary Health Networks. *Med. J. Aust.* 2015;**203**(5):219-19 doi: 10.5694/mja14.01702.
18. Cacioppo JT, Cacioppo S. Social Relationships and Health: The Toxic Effects of Perceived Social Isolation. *Soc. Personal. Psychol. Compass* 2014;**8**(2):58-72 doi: 10.1111/spc3.12087.
19. Cooney GM, Dwan K, Greig CA, et al. Exercise for depression. *Cochrane Database of Systematic Reviews* 2013(9) doi: 10.1002/14651858.CD004366.pub6.

- 1
- 2
- 3 20. Magnussen L, Ehiri J, Jolly P. Comprehensive Versus Selective Primary Health Care:  
4 Lessons For Global Health Policy. *Health Affairs* 2004;**23**(3):167-76 doi:  
5 10.1377/hlthaff.23.3.167.
- 6
- 7 21. Keleher H. Why primary health care offers a more comprehensive approach for tackling  
8 health inequities than primary care. *Aust. J. Prim. Health* 2001;**7**:57-61 doi:  
9 <http://dx.doi.org/10.1071/PY01035>.
- 10 22. Lavarack G, Labonte R. *Health promotion in action: From local to global empowerment*.  
11 London: Palgrave Macmillan, 2008.
- 12 23. Rose G. *The strategy of preventive medicine*. Oxford: Oxford University Press, 1992.
- 13 24. Dwyer J. Australian health system restructuring - what problem is being solved? *Australia*  
14 *and New Zealand Health Policy* 2004;**1**(6) doi: 10.1186/1743-8462-1-6.
- 15 25. National Health and Hospitals Reform Commission. *A healthier future for all Australians:*  
16 *Final report*. Canberra, ACT: Commonwealth of Australia, 2009.
- 17 26. Australian Institute of Health and Welfare. *Australia's Health 2016*. Canberra, ACT:  
18 AIHW, 2016.
- 19 27. Baum F, Freeman T, Lawless A, Jolley G. Community development - improving patient  
20 safety by enhancing the use of health services *Aust. Fam. Physician* 2012;**41**:424-28.
- 21 28. Labonte R. Heart health inequalities in Canada: Models, theory and planning. *Health*  
22 *Promot. Int.* 1992;**7**(2):119-27 doi: 10.1093/heapro/7.2.119.
- 23 29. Baum F, Fisher M. Why behavioural health promotion endures despite its failure to  
24 reduce health inequities. *Sociol. Health Illn.* 2014;**36**:213-25 doi: 10.1111/1467-  
25 9566.12112.  
26  
27  
28  
29  
30  
31  
32  
33  
34  
35  
36  
37  
38  
39  
40  
41  
42  
43  
44  
45  
46  
47  
48  
49  
50  
51  
52  
53  
54  
55  
56  
57  
58  
59  
60

1  
2  
3  
4  
5  
6  
7  
8  
9  
10  
11  
12  
13  
14  
15  
16  
17  
18  
19  
20  
21  
22  
23  
24  
25  
26  
27  
28  
29  
30  
31  
32  
33  
34  
35  
36  
37  
38  
39  
40  
41  
42  
43  
44  
45  
46  
47  
48  
49  
50  
51  
52  
53  
54  
55  
56  
57  
58  
59  
60

### Mechanisms

### Service Qualities

### Activities

### Activity Outcomes

### Community Health Outcomes

#### Social Justice and Social View of Health

- Accessible, locally delivered
- Community driven
- Mix of direct care, prevention, and promotion
- Multi-disciplinary teamwork
- Intersectoral and interagency collaboration
- Cultural respect

**Governance**

CPHC mechanisms are embedded in processes, systems and structures

Service management, administration, monitoring, evaluation

- Services that are:
- Encouraging of individual and community empowerment
  - Responsive to community needs and priority populations
  - Holistic
  - Efficient and Effective
  - Universal and used by those most in need
  - Culturally respectful

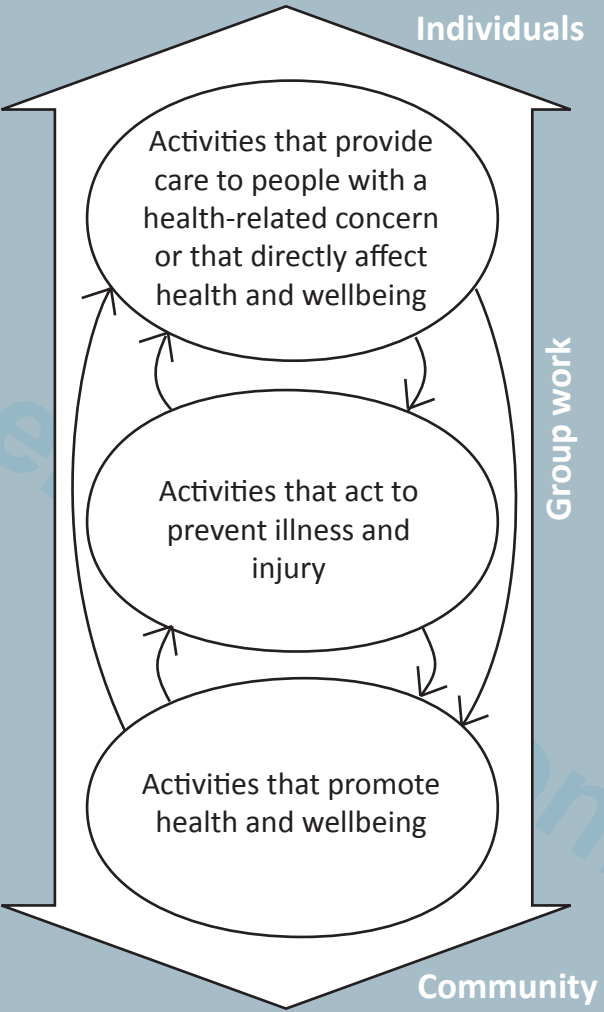

Contributes to achievement of

#### Health for All

Comprehensive PHC service delivery

Sustainable CPHC oriented health system

- Increased individual knowledge and skills
- Increased health enhancing behaviour
- Increased quality of life for individuals
- Slowed progression of conditions
- Decreased rates of preventable conditions and issues
- Increased supportive environment for health
- Increased social capital
- Increased planned, managed care, decreased acute, episodic care

- Improved health and wellbeing of individuals and the community
- Increased health equity

### Context

#### Inputs/Resources

- Staff, FTE, Funding
- Drugs, Equipment, Supplies

#### Community context

- Socio-demographics of area and changes
- Resources available for health in community

#### Organisational Operating Environment

- Funding (amount, cycles, silos)
- Externally prescribed programs
- State/regional strategic plans
- Higher level governance
- SA Health has Health in All Policies program

#### Socio-political context

- Broadly supportive political and bureaucratic environment

Populations receiving priority for service, e.g. low income, Aboriginal and Torres Strait Islander peoples



1  
2  
3  
4  
5  
6  
7  
8  
9  
10  
11  
12  
13  
14  
15  
16  
17  
18  
19  
20  
21  
22  
23  
24  
25  
26  
27  
28  
29  
30  
31  
32  
33  
34  
35  
36  
37  
38  
39  
40  
41  
42  
43  
44  
45  
46  
47  
48  
49  
50  
51  
52  
53  
54  
55  
56  
57  
58  
59  
60

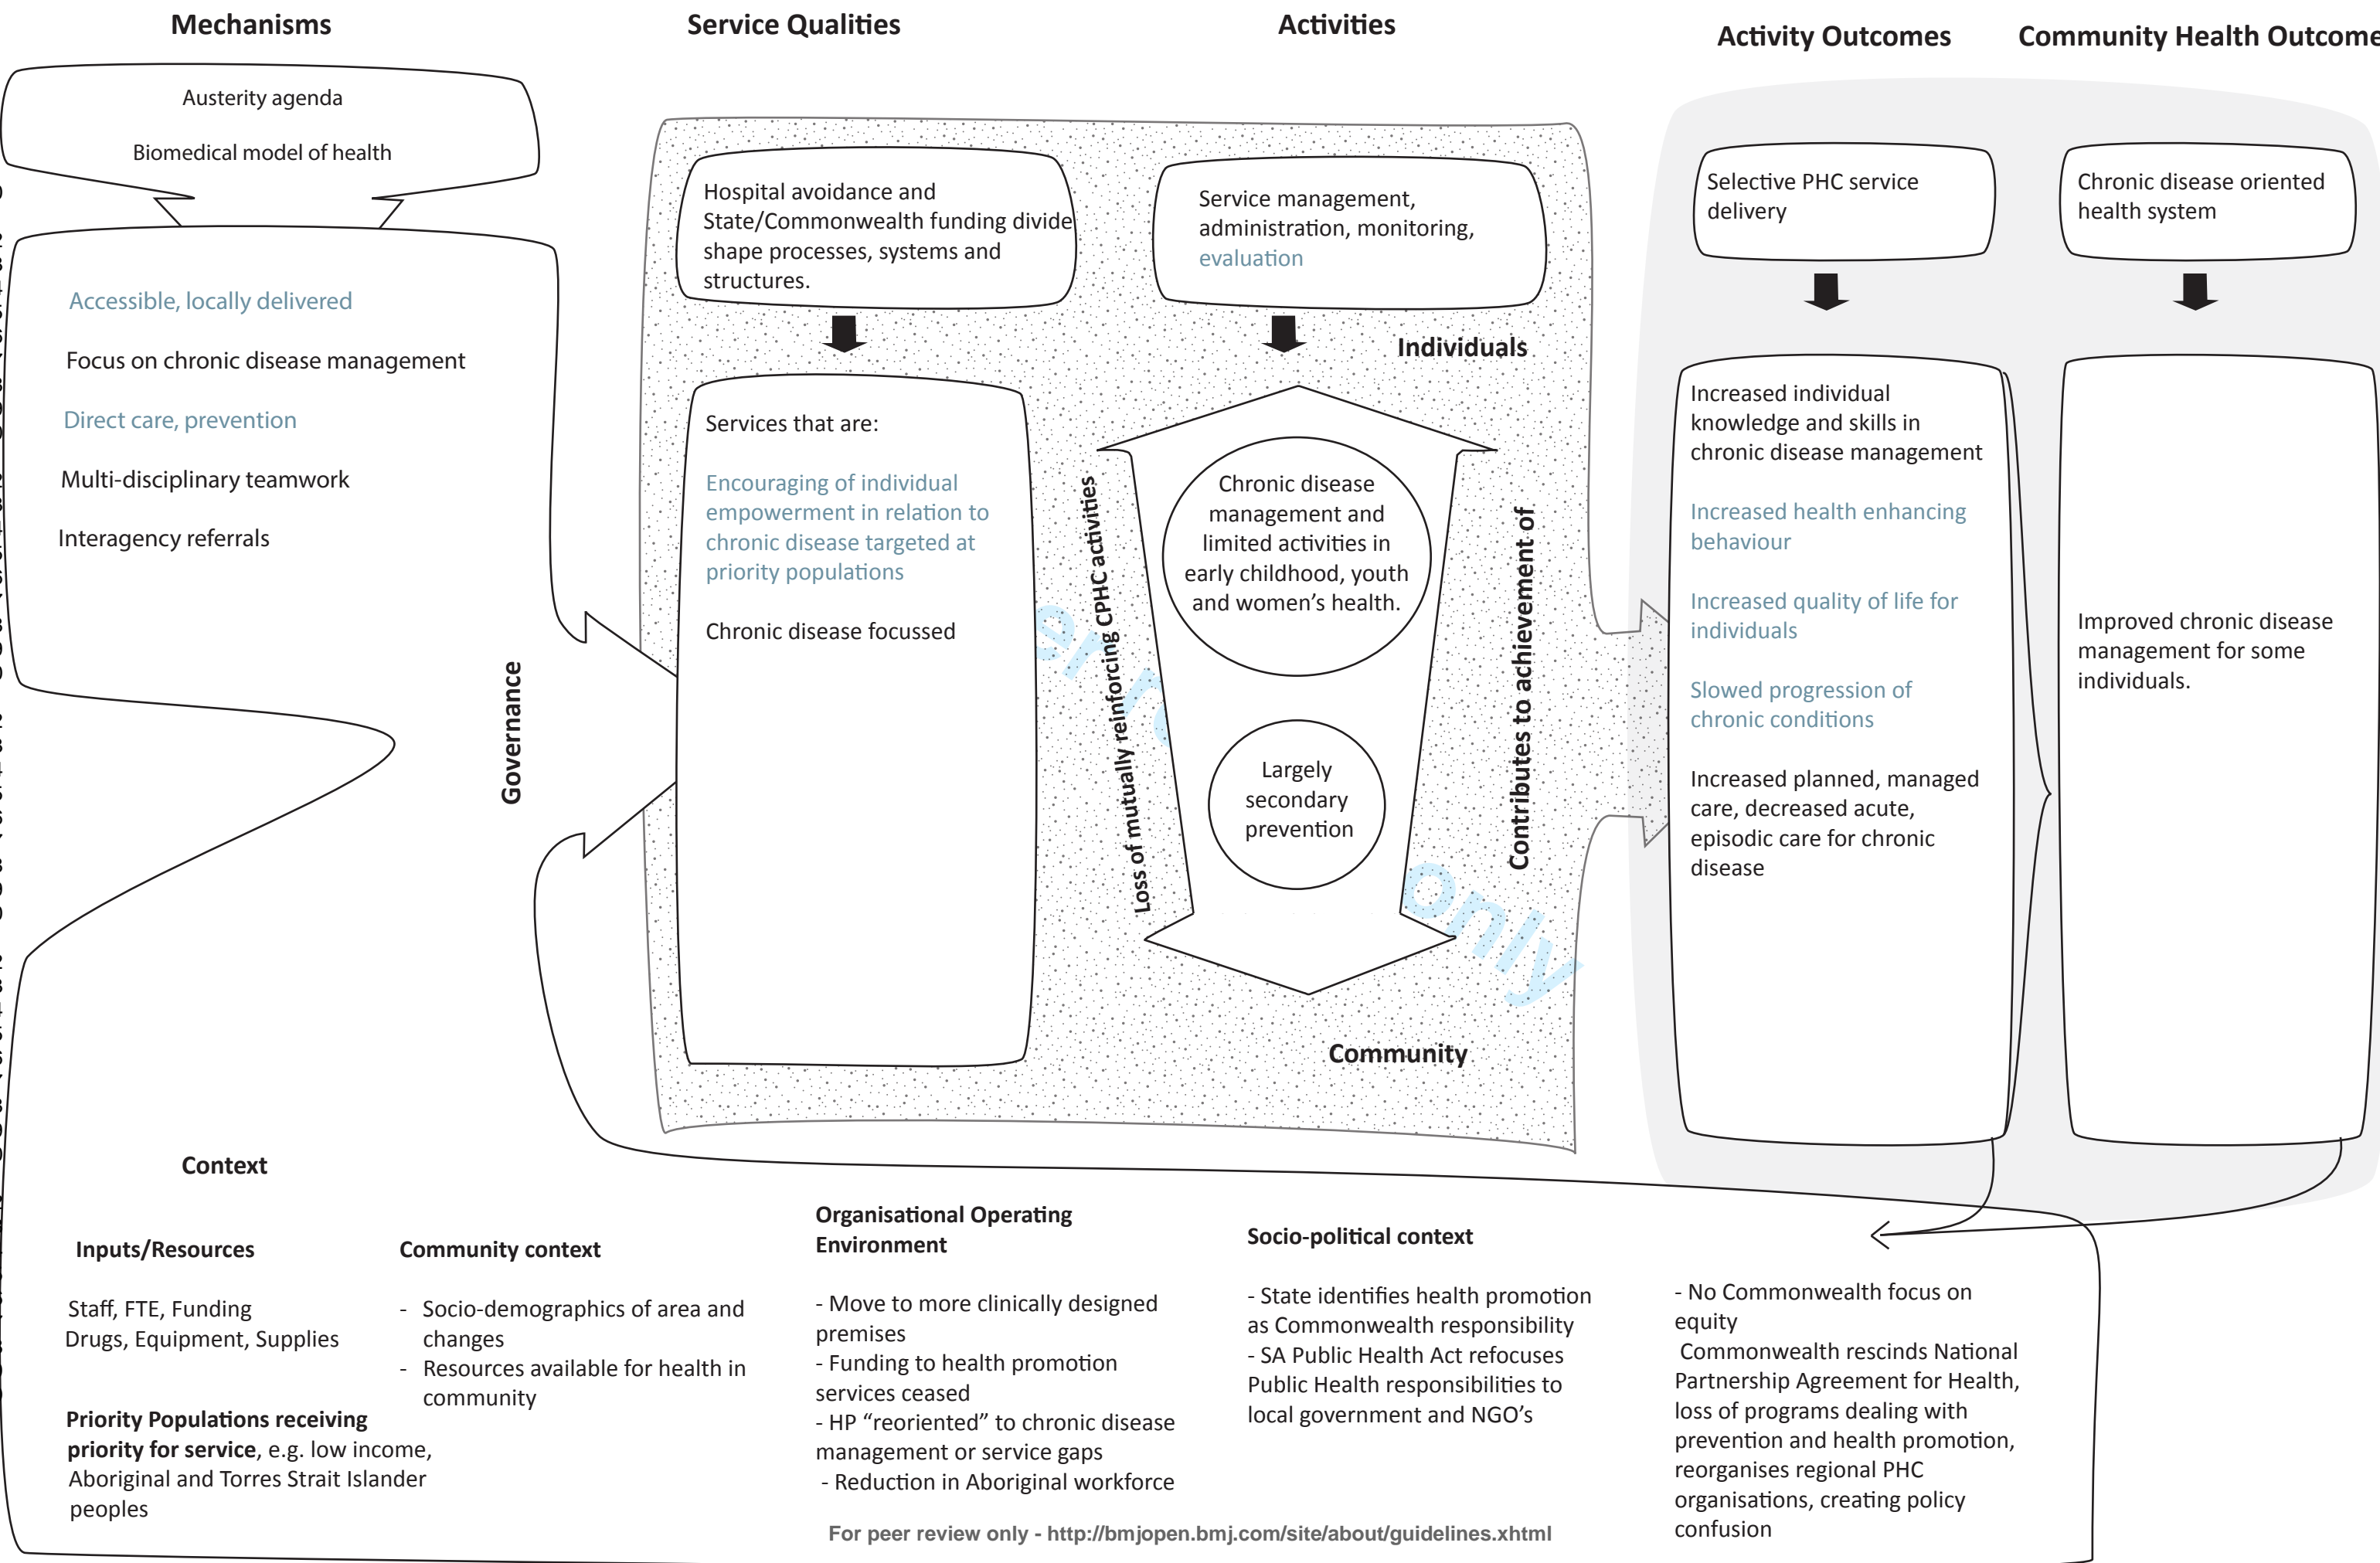

# BMJ Open

## What's the difference between comprehensive and selective primary health care? Evidence from a five year longitudinal realist case study in South Australia

|                                 |                                                                                                                                                                                                                                                                                                                                                                                                                                    |
|---------------------------------|------------------------------------------------------------------------------------------------------------------------------------------------------------------------------------------------------------------------------------------------------------------------------------------------------------------------------------------------------------------------------------------------------------------------------------|
| Journal:                        | <i>BMJ Open</i>                                                                                                                                                                                                                                                                                                                                                                                                                    |
| Manuscript ID                   | bmjopen-2016-015271.R1                                                                                                                                                                                                                                                                                                                                                                                                             |
| Article Type:                   | Research                                                                                                                                                                                                                                                                                                                                                                                                                           |
| Date Submitted by the Author:   | 15-Mar-2017                                                                                                                                                                                                                                                                                                                                                                                                                        |
| Complete List of Authors:       | Baum, Fran; Flinders University, Southgate Institute for Health, Society and Equity<br>Freeman, Toby; Flinders University, Southgate Institute for Health, Society and Equity<br>Lawless, Angela; Flinders University, Southgate Institute for Health, Society and Equity<br>Labonte, Ronald; University of Ottawa, Epidemiology and Community Medicine<br>Sanders, David; University of the Western Cape, School of Public Health |
| <b>Primary Subject Heading</b>: | Health services research                                                                                                                                                                                                                                                                                                                                                                                                           |
| Secondary Subject Heading:      | Public health                                                                                                                                                                                                                                                                                                                                                                                                                      |
| Keywords:                       | Health policy < HEALTH SERVICES ADMINISTRATION & MANAGEMENT, primary health care, neoliberalism                                                                                                                                                                                                                                                                                                                                    |
|                                 |                                                                                                                                                                                                                                                                                                                                                                                                                                    |

SCHOLARONE™  
Manuscripts

only

1  
2  
3 **What's the difference between comprehensive and selective primary health care?**

4  
5 **Evidence from a five year longitudinal realist case study in South Australia**

6  
7  
8  
9  
10 Fran Baum, Southgate Institute for Health, Society, and Equity, Flinders University,  
11 Adelaide, Australia

12  
13  
14 Toby Freeman, Southgate Institute for Health, Society, and Equity, Flinders University,  
15 Adelaide, Australia

16  
17  
18 Angela Lawless, Speech Pathology, Flinders University, Adelaide, Australia

19  
20  
21 Ronald Labonté, Institute of Population Health, University of Ottawa, Ottawa, Canada

22  
23 David Sanders, School of Public Health, University of the Western Cape, Cape Town, South  
24 Africa

25  
26  
27  
28  
29 Corresponding author:

30  
31 Prof. Fran Baum, Southgate Institute for Health, Society, and Equity, Flinders University,

32  
33 GPO Box 2100, Adelaide SA 5001

34  
35 Email: [fran.baum@flinders.edu.au](mailto:fran.baum@flinders.edu.au)

36  
37 Ph: + 61 8 7221 8410

38  
39  
40  
41  
42 Word count: 2,997



1  
2  
3 Mandatory Box

4  
5 *What is already known on this subject?*

6  
7 We know that the benefits of comprehensive primary health care and selective primary health  
8 care have been debated but the two have not been the subject of research which considers the  
9 characteristics of a whole service and there has been little research on comprehensive primary  
10 health care - as described in the Alma Ata Declaration of 1978 - in rich countries.  
11  
12  
13  
14

15  
16  
17  
18 *What this study adds?*

19  
20 Based on empirical data this paper provides a clear description of the program logic behind  
21 comprehensive primary health by outlining the operating context, underlying mechanisms,  
22 the service qualities, the activities, the activity outcomes and the anticipated community  
23 health outcomes. It then compares this with a selective approach and by examining each  
24 aspect of the program logic demonstrates how selective primary health care is unable to  
25 impact on population (as opposed to clinical) health outcomes.  
26  
27  
28  
29  
30  
31  
32  
33

34 End of box  
35  
36  
37  
38  
39  
40  
41  
42  
43  
44  
45  
46  
47  
48  
49  
50  
51  
52  
53  
54  
55  
56  
57  
58  
59  
60

## ABSTRACT

### Background

Since the World Health Organisation's Alma Ata Declaration on Primary Health Care (PHC) there has been debate about the advisability of adopting comprehensive or selective PHC.

Proponents of the latter argue that a more selective approach will enable interim gains while proponents of a comprehensive approach argue that it is needed to address the underlying causes of ill-health and improve health outcomes sustainably.

### Methods

This research is based on four case studies of government funded and run PHC services in Adelaide, South Australia. Program logic models were constructed from interviews and workshops. The initial model represented relatively comprehensive service provision in 2010. Subsequent interviews in 2013 permitted the construction of a selective PHC program logic model following a series of restructuring service changes.

### Results

Comparison of the PHC service program logic models before and after restructuring illustrates the changes to the operating context, underlying mechanisms, service qualities, activities, activity outcomes and anticipated community health outcomes. The PHC services moved from focusing on a range of community, group and individual clinical activities to a focus on the management of people with chronic disease. Under the more comprehensive model activities were along a continuum of promotive, preventive, rehabilitative and curative. Under the selective model the focus moved to rehabilitative and curative with very little other activity.

### Conclusion

1  
2  
3 The study demonstrates the difference between selective and comprehensive approaches to  
4  
5  
6  
7  
8  
9  
10  
11  
12  
13  
14  
15  
16  
17  
18  
19  
20  
21  
22  
23  
24  
25  
26  
27  
28  
29  
30  
31  
32  
33  
34  
35  
36  
37  
38  
39  
40  
41  
42  
43  
44  
45  
46  
47  
48  
49  
50  
51  
52  
53  
54  
55  
56  
57  
58  
59  
60

The study demonstrates the difference between selective and comprehensive approaches to  
PHC in a rich country setting and is useful in informing debates on PHC especially in the  
context of the Sustainable Development Goals.

## **STRENGTHS AND LIMITATIONS OF THIS STUDY**

- This study provides a unique empirical examination of differences between comprehensive and selective primary health care in practice.
- This difference is crucial and needs to be defined very clearly when health systems are being reoriented to PHC.
- The comprehensive model as envisaged by these services was limited by the relative limited scope of action on social determinants of health
- This study is limited by the scope for generalisation from five case studies.

## **INTRODUCTION**

The initial World Health Organisation (WHO) 1978 vision of Primary Health Care (PHC) was comprehensive, viewing health services as part of a new international economic order that would benefit all nations especially low income and groups living in disadvantage, that would encourage democratic participation in health, and help improve social and environmental contexts that create disease and risks for disease [1]. Health services were to be multi-disciplinary, attuned to local need, and emphasise disease prevention and health promotion. This comprehensive vision was overtaken by a pragmatic call for a more selective approach, albeit originally considered to be temporary until developing countries could afford a more comprehensive approach, which minimized the broader social change ambitions of the original vision, marginalised preventive and promotive actions, and emphasized responses to specific diseases or narrowly-defined health outcomes [2]. Although the WHO recommitted to PHC in 2008 [3] and the Commission on the Social Determinants of Health

1  
2  
3 [4] endorsed PHC as the corner stone of a health system and a strategy for taking action on  
4  
5 social determinants of health at a local level, selective PHC has dominated health system  
6  
7 reforms in most low and middle income countries, abetted by growth in vertical (disease-  
8  
9 specific) global health funds [5]. Most empirical work on PHC implementation has come  
10  
11 from low and middle income countries, with few systematic studies of comprehensive PHC  
12  
13 from high income countries. This paper reports on an Australian study which tracked a shift  
14  
15 from comprehensive to selective PHC and has enabled development of a program logic  
16  
17 description of the two forms of PHC. We do not claim that our typification of selective PHC  
18  
19 in this study necessarily captures all interpretations (past and present) of this form of PHC.  
20  
21 Rather, it allows us to articulate the difference between two models in a particular high  
22  
23 income country context when so much discourse about PHC (both within Australia, and more  
24  
25 globally under the post-2015 Sustainable Development Goal of promoting Universal Health  
26  
27 Coverage) does not make the distinction.  
28  
29  
30  
31  
32  
33  
34

### 35 **Primary health care in high income countries**

36 In high income countries, the best examples of comprehensive PHC have been community  
37  
38 health centres in Canada (<http://www.cachc.ca/>), the USA [6], and Australia [7]. Community  
39  
40 health centres are characterised by multi-disciplinary teamwork, a social understanding of  
41  
42 health, community participation in management, advocacy for policy changes to address the  
43  
44 social determinants of health at higher government levels, and services that cover  
45  
46 rehabilitation, treatment, prevention and promotion. These centres have remained marginal  
47  
48 within their country health systems, faced opposition from mainstream medicine and  
49  
50 struggled to maintain their comprehensiveness.  
51  
52

53  
54 In Australia, community health centres were the legacy of a 1970s national program and were  
55  
56 maintained by state governments including the South Australian government which is the  
57  
58  
59  
60

1  
2  
3 focus of this study. There have been very few studies of whole PHC services. Labonte et al.  
4  
5 [8] found that most of the empirical PHC literature focused on “slices” or particular  
6  
7 programs, rather than studying the overall service in a systematic way. Our research studied  
8  
9 the totality of services in a way not previously reported in the literature [9]. While we didn't  
10  
11 anticipate it at the outset, our five year study (2009-2014) witnessed a series of structural  
12  
13 reorganisations and policy changes [10] which undermined the comprehensive nature of our  
14  
15 case study services. The aim of this paper is to describe the difference between a  
16  
17 comprehensive and selective model of PHC in a high-income country setting.  
18  
19

## 20 21 **METHODS**

22  
23 This paper draws on a five year longitudinal realist [11] case study of PHC services which  
24  
25 used program logic modelling to describe the services and their expected outcomes [for  
26  
27 details see 12]. This paper draws on a synthesis of our findings to examine the difference  
28  
29 between comprehensive and selective PHC. Our study was conducted with seven PHC  
30  
31 services and this paper draws on data from five state-managed PHC services (the other two  
32  
33 are non-government services and did not experience the changes reported in this paper). The  
34  
35 services are anonymised as A, B, C, D (an Aboriginal health team), and E. Service B  
36  
37 withdrew from further participation in the study in 2012, due to high staff workloads and  
38  
39 significant organisational change. Service E agreed to join as a replacement. Further details  
40  
41 of the services in 2010 and 2103 are provided in Table 1. Each case study service adopted a  
42  
43 reasonably comprehensive PHC approach at the onset of the study although A, C, and E did  
44  
45 not provide medical services reflecting the historical opposition of the organised medical  
46  
47 profession to these centres [13]. In 2009 all services had organisational statements which  
48  
49 demonstrated strong commitment to the Alma Ata Declaration principles including an  
50  
51 explicit commitment to social determinants of health and health promotion. These documents  
52  
53 were analysed as part of this study. This paper also draws on previous work in our 5 year  
54  
55  
56  
57  
58  
59  
60

1  
2  
3  
4  
5  
6  
7  
8  
9  
10  
11  
12  
13  
14  
15  
16  
17  
18  
19  
20  
21  
22  
23  
24  
25  
26  
27  
28  
29  
30  
31  
32  
33  
34  
35  
36  
37  
38  
39  
40  
41  
42  
43  
44  
45  
46  
47  
48  
49  
50  
51  
52  
53  
54  
55  
56  
57  
58  
59  
60

study which reports on a detail analysis of Federal and State government policy documents which demonstrate the changing context that drove the change from comprehensive to selective PHC detailed in this paper [14].

For peer review only

Table 1: Characteristics of case study state-managed PHC services: 2010 and 2013

| Service | Budget (p.a.)                             | Main source of funding | Governance    | Approximate # of staff (FTE)            | Range of services                                                                                                                                                                                                                                                                  | Example professions                                                                                                                                                                  |
|---------|-------------------------------------------|------------------------|---------------|-----------------------------------------|------------------------------------------------------------------------------------------------------------------------------------------------------------------------------------------------------------------------------------------------------------------------------------|--------------------------------------------------------------------------------------------------------------------------------------------------------------------------------------|
| A       | 2010: \$1.2m<br>2013: \$0.5m <sup>1</sup> | SA Health              | State-managed | 2010: 16 (13.5)<br>2013: 10 (8.1)       | Early childhood, <i>health promotion, community development, allied health, chronic condition self-management, mental health, lifestyle advisor</i>                                                                                                                                | Social worker, speech pathologist, occupational therapist, dietitian, <i>nurse, cultural worker, lifestyle advisor, primary health care worker</i>                                   |
| B       | 2010: \$1.1m<br>2013: N/A <sup>2</sup>    | SA Health              | State-managed | 2010: 26 (20)<br>2013: N/A <sup>2</sup> | Medical clinic, allied health, early childhood, podiatry, chronic condition self-management, <i>lifestyle advisor, health promotion programs and groups, community development, peer education</i>                                                                                 | Medical officer, podiatrist, nurse, speech pathologist, <i>lifestyle advisor, PHC worker</i>                                                                                         |
| C       | 2010: \$1.7m<br>2013: \$1.6m              | SA Health              | State-managed | 2010: 36 (22)<br>2013: 25 (15.3)        | Chronic condition self-management, early childhood, family violence, mental health, supported residential facilities services, <i>community garden, lifestyle advice, health promotion, local initiatives, parenting groups, mindfulness and meditation groups, healthy ageing</i> | Nurse, dietitian, speech pathologist, psychologist, occupational therapist, cultural worker, social worker, podiatrist, <b>exercise physiologist, consultant in General Medicine</b> |
| D       | 2010:                                     | SA Health              | State-managed | 2010: 12 (10.8)                         | Community lunch program, <i>health</i>                                                                                                                                                                                                                                             | Aboriginal health worker,                                                                                                                                                            |

1  
2  
3  
4  
5  
6  
7  
8  
9  
10  
11  
12  
13  
14  
15  
16  
17  
18  
19  
20  
21  
22  
23  
24  
25  
26  
27  
28  
29  
30  
31  
32  
33  
34  
35  
36  
37  
38  
39  
40  
41  
42  
43  
44  
45  
46  
47  
48  
49

|   |                        |           |               |                        |                                                                                                                                                                                                           |                                                                                                                                                           |
|---|------------------------|-----------|---------------|------------------------|-----------------------------------------------------------------------------------------------------------------------------------------------------------------------------------------------------------|-----------------------------------------------------------------------------------------------------------------------------------------------------------|
|   | \$0.5m                 |           |               | 2013: N/A <sup>3</sup> | <i>promotion groups, 1:1 case management/referral/ advocacy, transport, community events, combined into medical clinic, Aboriginal clinical health workers, learning centre</i>                           | PHC worker                                                                                                                                                |
|   | 2013: N/A <sup>3</sup> |           |               |                        |                                                                                                                                                                                                           |                                                                                                                                                           |
| E | 2010: N/A <sup>4</sup> | SA Health | State-managed | 2010: N/A <sup>4</sup> | Early childhood, chronic disease self-management, mental health, antenatal and postnatal support, <i>domestic violence services, healthy ageing, health promotion, community development</i> <sup>4</sup> | Social worker, dietitian, psychologist, speech pathologist, nurse, occupational therapist, community health worker, <i>lifestyle advisor</i> <sup>4</sup> |
|   | 2013: \$1.7m           |           |               | 2013: 21 (16.6)        |                                                                                                                                                                                                           |                                                                                                                                                           |

Note. Italicised services and professions had ceased by 2013, Bolded services and professions were new since 2010.

<sup>1</sup> Approximate – budget was combined with another site. Budget for 2 sites was \$1.1m

<sup>2</sup> Not available for 2013, due to service withdrawing

<sup>3</sup> Service was restructured and merged with another service, cannot calculate a comparison to 2010.

<sup>4</sup> Service joined study in 2012 – staff, budget, services info not available for 2010, services and professions are since 2012



## Staff interviews

We interviewed staff in 2009 and 2013. The details of the interviews have been reported elsewhere [15]. In 2013, 63 interviews were conducted with service practitioners and managers in the seven PHC sites, and regional and central health executives.

Interview questions were developed by the research team based on the attributes of PHC and data collected on changes in PHC during 2009-2013, and piloted on two practitioners and one manager from non-participating PHC services. Interviews were audio recorded, transcribed, and de-identified. Ethics approval was received from the Southern Adelaide Clinical Human and Aboriginal Health Research Ethics Committees. Written consent was obtained from all participants.

A team approach was taken to thematic analysis, aided by NVivo software. Codes were discussed and revised in team meetings, and four interviews were double-coded or triple-coded, ensuring rigour through constant monitoring of analysis and interpretation [16].

## Program logic models

An overarching model of comprehensive PHC in Australia was constructed in 2010 using a collaborative process [12] and drawing on the models constructed for each service. Following the interviews conducted in 2013 a new program logic model was constructed by the research team reflecting the changes and revealing the more selective nature of the state-managed services. The program logic models we used are not akin to practice audits although we note that the dimension specified in the Australian Quality and Safety Commission's [17] PHC practice level indicators of quality do overlap significantly with the mechanism and activities in the selective program logic.

## FINDINGS

Figures 1 & 2 present the before and after picture of PHC. In Figure 1 the comprehensive nature of the services in 2009-10 is shown according to the operating context, underlying

1  
2  
3 mechanisms, service qualities, activities, activity outcomes and community health outcomes.

4  
5 By 2014 these had changed significantly in the services and these changes are shown in

6  
7 Figure 2 and elaborated on below.

8  
9  
10 [Insert Figures 1 and 2 about here]

### 11 12 **Context**

13 In 2009-10 the context of the services was reasonably supportive of comprehensive service  
14 delivery. By 2014 the context for the services had changed so that their work had little  
15 political or bureaucratic support and their mandate changed from being responsive local  
16 services to one in which their agenda was centrally driven with a focus on chronic disease  
17 management. This changing context partly reflected on-going dispute between the Australian  
18 Federal and State governments regarding which authority was responsible for PHC and health  
19 promotion, largely in terms of who was to pay for the activities. While the Federal  
20 government had introduced regional PHC authorities (first Medicare Locals and then Primary  
21 Health Networks) their mandate and their practice were not comprehensive [18] and they did  
22 not work with the state-funded PHC services [19].  
23  
24  
25  
26  
27  
28  
29  
30  
31  
32  
33  
34  
35  
36

### 37 **Mechanisms**

38 The main difference between the selective and comprehensive model was that the service  
39 components had contracted considerably by 2014. Rather than offering services that  
40 responded to a wide range of community health issues the service model was reduced to a  
41 focus on chronic disease management and some limited early childhood services. Previously  
42 the services had responded to a much broader range of health issues including domestic  
43 violence, injury prevention and food quality. The new selective model was also inwardly  
44 focused whereas the comprehensive model had relied on health workers linking with other  
45 sectors, reaching out to the community and, albeit in a limited way, paying some attention to  
46  
47  
48  
49  
50  
51  
52  
53  
54  
55  
56  
57  
58  
59  
60

1  
2  
3 social determinants of health. Most significantly the selective model was based on a  
4  
5 biomedical understanding of health with little or no attention to social factors.  
6  
7

## 8 **Service Qualities**

9

10  
11 The comprehensive model encouraged individual and community empowerment and  
12 responded to community needs. The health professionals also saw that the comprehensive  
13 model was holistic, used by those most in need and placed high emphasis on being culturally  
14 respectful. By contrast the selective model paid very little attention to these attributes. The  
15 Aboriginal health workers at Service D felt less able to work in ways that suited the  
16 community, and some staff at the other services felt their service may be less welcoming to  
17 Aboriginal and Torres Strait Islander clients than in the past:  
18  
19  
20  
21  
22  
23  
24  
25  
26

27 “I don't think the centre is particularly safe or friendly for Aboriginal clients. It's just a little  
28 bit more clinical ... we don't have the Aboriginal flags and we don't have the things that  
29 would make Aboriginal people feel especially welcome to this service, unfortunately.”  
30  
31  
32

33 Some services also had less capacity to flexibly respond to incorporate the needs of client  
34 groups, such as Aboriginal and Torres Strait Islander peoples, people from supported  
35 housing, and migrants, as local initiatives, health promotion activities, outreach, and  
36 community development work were curtailed. Limits to comprehensiveness reported were  
37 that resource limitations meant services had to be targeted. The Aboriginal health service was  
38 open to all Aboriginal people, however. Under the comprehensive model the aim was a broad  
39 response to community health needs which were identified in consultation with the  
40 community. Thus a practitioner spoke of this engagement:  
41  
42  
43  
44  
45  
46  
47  
48  
49  
50

51 “Community health was very much around the Ottawa Charter and things like that,  
52 about being very accountable to your local community, and a lot of local community  
53  
54  
55  
56  
57  
58  
59  
60

1  
2  
3 involvement and a lot of local ownership of how the centre operated and what  
4 services the centre provided, and a lot of local initiatives.” (practitioner, Service B)  
5  
6  
7  
8

9  
10 Other comments demonstrated that community advice was no longer valued:

11 “No community involvement whatsoever. The only thing we do have is a client  
12 feedback form” (practitioner, Service C)  
13

14  
15  
16 “... you can’t go out and work with the community or plan with the community or  
17 other agencies because it’s become that siloed work.” (practitioner, Service A)  
18  
19  
20

21  
22  
23 The selective model had a narrow focus on reducing hospital admissions:

24  
25 “We really are now refocusing [Service A] to the high end chronic conditions that we  
26 feel we can create a service continuum interfacing with the acute sector and really  
27 focusing on hospital avoidance for clients with those conditions.” (regional health  
28 executive)  
29  
30  
31  
32  
33  
34  
35

## 36 **Service Activities**

37  
38  
39 The main difference in service activities was that the selective model focused solely on the  
40 treatment and secondary prevention activities for individuals. Nearly all the focus was on  
41 chronic disease management and the only other services remaining were for children but their  
42 scope had been reduced. The comprehensive model had a wider gaze and saw its mandate as  
43 working with individuals and the community as a whole in a variety of ways as this  
44 comments indicates:  
45  
46  
47  
48  
49  
50  
51

52  
53 “In the past we’ve run a wider scope of programs and groups, so it wasn’t uncommon  
54 to team up with a nurse and do some more preventative lifestyle programs, which we  
55 can’t do anymore.” (practitioner, Service E)  
56  
57  
58  
59  
60

1  
2  
3 Many of the activities lost were of benefit in relation to many diseases. For example activities  
4 that promote social connection are good for mental health and physical health [20] and  
5  
6 that promote social connection are good for mental health and physical health [20] and  
7  
8 exercise is a key component in management of mental health issues such as depression [21]  
9  
10 as well as diabetes. The comprehensive model included a wider range of activities, shown in  
11  
12 Box 1.

### 13 14 15 16 **Box 1 Activities present in comprehensive but not selective PHC**

17  
18 Community Advocacy campaigns including on domestic violence, Aboriginal and Torres  
19  
20 Strait Islander rights and cultural pride

21  
22 Individual advocacy: supporting individuals in quest to gain housing, welfare benefits

23  
24 Support Groups: for domestic violence, men's groups, women's groups, and mothers and  
25  
26 babies groups

27  
28 Community activities: lunches, school and childcare centre engagement

29  
30 Community development: engagement with community members on health issues they are  
31  
32 concerned about

33  
34 Intersectoral actions: membership of regional roundtables, engagement with other sectors on  
35  
36 range of health issues

37  
38  
39  
40 End of Box

41  
42  
43  
44  
45 In 2009 the health professionals reported working with the community in many different  
46  
47 ways, often going out to community sites, but by 2013 institutional support for this activity  
48  
49 had gone:

50  
51  
52 "It's a lot more client-coming-into-the-service-based, rather than going out into the  
53  
54 community ... we're not working with the [adult education school] or the local  
55  
56  
57  
58  
59  
60

1  
2  
3 childcare centre, whereas probably in 2009 we were stepping outside our doors a little  
4  
5 bit. (practitioner, Service A).  
6  
7  
8

9  
10 The move from a comprehensive to a selective set of activities was summed up by this  
11  
12 nutritionist's comment:  
13

14 "We would visit community groups regularly and be a guest speaker for example. We  
15  
16 would run group programs that were really around increasing personal knowledge and  
17  
18 skills, very hands on practical - like cooking programs. That work has slowly been  
19  
20 whittled out of the role. We would do like a split of time, like 30% of the time would  
21  
22 be client direct, 30% on groups and then 30% would be health promotion and other  
23  
24 activities. So it might be networking with a local childcare centre, for example,  
25  
26 helping do menu reviews, supporting community initiatives and really being  
27  
28 responsive to the local community needs. That has turned into now just offering one  
29  
30 on one nutrition work." (practitioner, Service E)  
31  
32  
33

34 In 2009 the services worked with other sectors, including for example at Service E a series of  
35  
36 roundtables on issues including early childhood development, domestic violence and injury  
37  
38 prevention. By 2014 all that work had ceased. Thus a narrowing down of service activities  
39  
40 typified the changes over the study period.  
41  
42  
43  
44

## 45 46 **Activity outcomes** 47

48  
49 The impact of the changes to the mechanisms and service activities are evident in terms of the  
50  
51 expected activity outcomes. Under the comprehensive model outcomes were expected in  
52  
53 individuals and also for communities (e.g., more supportive environments, increased social  
54  
55 capital). The selective PHC outcomes were limited to improved chronic disease management  
56  
57  
58  
59  
60

1  
2  
3 and aimed for more planned, managed care and decreased acute, episodic care for chronic  
4  
5 disease, and a reduction in hospital admissions. Thus the activity outcomes are less  
6  
7 ambitious.  
8

## 9 10 **COMMUNITY HEALTH OUTCOMES**

11 The differences between the models becomes starkest in the likely outcomes. The selective  
12  
13 model is expected to lead to improved chronic disease management for some individuals and  
14  
15 so have negligible population health impact. By contrast the comprehensive model anticipates  
16  
17 improving health and well-being in individuals (including those with chronic disease) and the  
18  
19 community and also to reduce health inequities. Selective PHC leads to a chronic disease  
20  
21 treatment focussed health system with little capacity to prevent disease or promote health.  
22  
23 The comprehensive model provides a health system that would make some contribution to  
24  
25 reducing the burden of disease and also promote well-being more generally, although the  
26  
27 model depends on being supported by broader government action on the upstream social  
28  
29 determinants.  
30  
31  
32

## 33 34 **STUDY LIMITATIONS**

35  
36 This study is limited by the scope for generalisation from five case studies. Inevitably case  
37  
38 studies are context dependent and so care has to be taken in extrapolating from this study to  
39  
40 other settings. The changing context of the study sites meant that the collaborative processes  
41  
42 we used to develop the program logic models in 2009 was not possible for the 2014 model.  
43  
44 We are, however, confident that the model does reflect the reality in the services concerned  
45  
46 because our analysis draws on in-depth interviews offering detailed insights to the changes  
47  
48 since the original model was developed.  
49  
50

## 51 52 **DISCUSSION**

53  
54 Our findings have shown that while there are similarities between the two models of PHC in  
55  
56 that they are both community-based, involve multi-disciplinary staff and respond to  
57  
58  
59  
60

1  
2  
3 individuals in need of care, beyond that there are significant differences that mean the  
4  
5 capacity for community health improvement is reduced significantly. This difference is  
6  
7 crucial and needs to be defined very clearly when health systems are being reoriented to  
8  
9 PHC. Previous delineations between comprehensive and selective PHC have been limited to  
10  
11 short theoretical accounts [22 23] whereas this study provides a unique empirical examination  
12  
13 of differences in the two visions in on the ground practice.  
14

15  
16 Chronic disease management is vital given the increasing burden of chronic disease. But it is  
17  
18 short sighted to design a PHC system solely for this purpose. A more comprehensive model  
19  
20 offers many benefits to a community. Community involvement in management and planning  
21  
22 of a health service helps ensure they respond to community need [24]. A focus on prevention  
23  
24 and the promotion of well-being in PHC is an important component of a health system's  
25  
26 capacity to prevent disease. As Rose [25] has demonstrated prevention requires more than a  
27  
28 focus on those already ill, rather making smaller changes across the whole population and  
29  
30 reducing the risk by clinically insignificant amounts adds up to a far greater contribution to  
31  
32 prevention. Thus while selective PHC appears to have an inherent logic in that it focuses on  
33  
34 people with disease making high demands on the health service, its sets the health system up  
35  
36 to run endlessly, like a rat on a wheel, because there is no prospect that it can stem the flow  
37  
38 into this disease category. There appears to be nothing in the logic of the selective approach  
39  
40 that suggests it can prevent new cases emerging.  
41  
42  
43

44  
45 We acknowledge that the comprehensive model as envisaged by these services did not  
46  
47 include extensive advocacy on upstream determinants such as income inequity,  
48  
49 unemployment or housing. Thus its claim to be comprehensive was limited by the relative  
50  
51 limited scope of action on social determinants of health. Elsewhere we have detailed the  
52  
53 management and funding pressures that led to a retreat from a more comprehensive model in  
54  
55 South Australia [10]. This retreat was despite the fact that Australian reviews of the health  
56  
57  
58  
59  
60



1  
2  
3 system have reinforced the importance of PHC and health promotion in particular [26 27].  
4  
5 Our models show that the broader socio-political context is crucial in shaping implementation  
6  
7 of PHC. Because comprehensive PHC challenges the powerful dominant bio-medical model  
8  
9 of health, a particularly supportive political context is required for its implementation. In  
10  
11 Australia there has been declining investment in prevention – the spending has dropped from  
12  
13 2.2% to 1.4% [28, p. 255]. In this context comprehensive PHC is unlikely to flourish.  
14  
15 Unlike the selective model comprehensive PHC reaches out to people for whom health  
16  
17 services are hard to reach through a range of community development activities [29]. Actions  
18  
19 to address local social determinants of health also seek to create supportive community  
20  
21 environments for health and so promote health for the whole population. The importance of  
22  
23 this continuum of action has long been recognised [30] yet its acceptance and integration in  
24  
25 to health systems is proving very difficult. Baum and Fisher [31] have argued that there are  
26  
27 structural pressures against a social approach to prevention including the inherent  
28  
29 individualism driving political and social thought in many industrialised countries, and the  
30  
31 considerable corporate pressures which exert influences on policy dialogues to keep the focus  
32  
33 on individual behaviours rather than structural factors that drive poor health and health  
34  
35 inequities. These pressures make it even more important to be clear on the different styles of  
36  
37 PHC and to specify what constitutes a comprehensive and selective model. The two models  
38  
39 presented in this paper enable others to assess the extent to which their PHC services are  
40  
41 comprehensive and operating in an environment which is supportive of such approaches.  
42  
43  
44  
45  
46  
47  
48

## 49 **CONTRIBUTORSHIP STATEMENT**

50  
51 FB oversaw the research, led the design of the research, contributed to data collection and  
52  
53 analysis, and led the writing of this journal article. TF and AL contributed to the design of the  
54  
55 research, and contributed to data collection and analysis, and the writing of this journal  
56  
57  
58  
59  
60

1  
2  
3 article. RL and DS contributed to the design of the research, analysis of findings, and the  
4  
5 writing of this journal article.  
6  
7  
8

## 9 10 **ACKNOWLEDGEMENTS**

11 We would like to acknowledge the staff of each participating service and thank them for their  
12  
13 time and trust in allowing us to conduct research in partnership with them.  
14  
15  
16

## 17 18 **DATA SHARING STATEMENT**

19 No additional data available.  
20  
21  
22

## 23 24 **COMPETING INTERESTS**

25 The authors declare they have no competing interests.  
26  
27  
28  
29  
30  
31

## 32 33 **FUNDING**

34 This research was supported by the National Health and Medical Research Council (grant  
35  
36 number 535041).  
37  
38  
39  
40

## 41 42 **REFERENCES**

- 43 1. WHO. Declaration of Alma-Ata, International Conference on Primary Health Care, USSR,  
44 6-12 September. Alma Ata: World Health Organization, 1978.
- 45 2. Walsh JA, Warren KS. Selective primary health care: An interim strategy for disease  
46 control in developing countries. *New England Journal of Medicine* 1979;**301**(18) doi:  
47 10.1056/NEJM197911013011804.
- 48 3. WHO. World health report: Primary health care now more than ever. Geneva: WHO, 2008.
- 49 4. Commission on Social Determinants of Health. Closing the gap in a generation: Health  
50 equity through action on the social determinants of health. Geneva: World Health  
51 Organization, 2008.
- 52 5. Sanders D, Baum FE, Benos A, Legge D. Revitalising primary healthcare requires an  
53 equitable global economic system - now more than ever. *Journal of Epidemiology and*  
54 *Community Health* 2011;**65**(8):661-65 doi: 10.1136/jech.2009.095125.
- 55 6. Lefkowitz B. *Community health centres: A movement and the people who made it happen*.  
56  
57 Piscataway, NJ: Rutgers University Press, 2007.  
58  
59  
60

- 1
- 2
- 3 7. Baum F. Community health services in Australia. In: Germov J, ed. *Second Opinion*, 5th
- 4 ed. 5th ed. Melbourne, Australia: Oxford University Press, 2013.
- 5 8. Labonte R, Sanders D, Baum F, et al. Implementation, effectiveness and political context
- 6 of comprehensive primary health care: preliminary findings of a global literature
- 7 review. *Aust. J. Prim. Health* 2008;**14**(3):58-67 doi: 10.1071/PY08037.
- 8 9. Labonté R, Sanders D, Packer C, Schaay N. Is the Alma Ata vision of comprehensive
- 9 primary health care viable? Findings from an international project. *Global Health*
- 10 *Action* 2014;**7** doi: 10.3402/gha.v7.24997.
- 11 10. Baum F, Freeman T, Sanders D, Labonté R, Lawless A, Javanparast S. Comprehensive
- 12 primary health care under neo-liberalism in Australia. *Soc. Sci. Med.* 2016;**168**:43-52
- 13 doi: <http://dx.doi.org/10.1016/j.socscimed.2016.09.005>.
- 14 11. Pawson R, Tilley N. *Realistic Evaluation*. London: Sage, 1997.
- 15 12. Lawless A, Freeman T, Bentley M, Baum F, Jolley G. Developing a good practice model
- 16 to evaluate the effectiveness of comprehensive primary health care in local
- 17 communities. *BMC Fam. Pract.* 2014;**15**:99 doi: 10.1186/1471-2296-15-99.
- 18 13. Raftery J. The social and historical context. In: Baum F, ed. *Health for All: The South*
- 19 *Australian Experience*. Adelaide, SA: Wakefield Press, 1995:19-37.
- 20 14. Jolley G, Freeman T, Baum F, et al. Health policy in South Australia 2003–10: primary
- 21 health care workforce perceptions of the impact of policy change on health
- 22 promotion. *Health Promot. J. Aust.* 2014;**25**(2):116-24.
- 23 15. Freeman T, Baum F, Lawless A, et al. Revisiting the ability of Australian primary health
- 24 care services to respond to health inequity. *Aust. J. Prim. Health* 2015;**22**:332-38 doi:
- 25 <http://dx.doi.org/10.1071/PY14180>.
- 26 16. Morse JN, Barrett M, Mayan M, Olson K, Spiers J. Verification strategies for establishing
- 27 reliability and validity in qualitative research. *Int. J. Qual. Methods* 2002;**1**:13-22 doi:
- 28 10.1177/160940690200100202.
- 29 17. Australian Commission on Safety and Quality in Healthcare. Draft national set of
- 30 practice-level indicators of safety and quality for primary health care Sydney, NSW:
- 31 Australian Commission on Safety and Quality in Health Care, 2012.
- 32 18. Javanparast S, Baum F, Freeman T, et al. Lessons from Medicare Locals for Primary
- 33 Health Networks. *Med. J. Aust.* in press.
- 34 19. Javanparast S, Baum F, Barton E, et al. Medicare Local–Local Health Network
- 35 partnerships in South Australia: lessons for Primary Health Networks. *Med. J. Aust.*
- 36 2015;**203**(5):219-19 doi: 10.5694/mja14.01702.
- 37 20. Cacioppo JT, Cacioppo S. Social Relationships and Health: The Toxic Effects of
- 38 Perceived Social Isolation. *Soc. Personal. Psychol. Compass* 2014;**8**(2):58-72 doi:
- 39 10.1111/spc3.12087.
- 40 21. Cooney GM, Dwan K, Greig CA, et al. Exercise for depression. *Cochrane Database of*
- 41 *Systematic Reviews* 2013(9) doi: 10.1002/14651858.CD004366.pub6.
- 42 22. Magnussen L, Ehiri J, Jolly P. Comprehensive Versus Selective Primary Health Care:
- 43 Lessons For Global Health Policy. *Health Affairs* 2004;**23**(3):167-76 doi:
- 44 10.1377/hlthaff.23.3.167.
- 45 23. Keleher H. Why primary health care offers a more comprehensive approach for tackling
- 46 health inequities than primary care. *Aust. J. Prim. Health* 2001;**7**:57-61 doi:
- 47 <http://dx.doi.org/10.1071/PY01035>.
- 48 24. Lavarack G, Labonte R. *Health promotion in action: From local to global empowerment*.
- 49 London: Palgrave Macmillan, 2008.
- 50 25. Rose G. *The strategy of preventive medicine*. Oxford: Oxford University Press, 1992.
- 51 26. Dwyer J. Australian health system restructuring - what problem is being solved? *Australia*
- 52 *and New Zealand Health Policy* 2004;**1**(6) doi: 10.1186/1743-8462-1-6.
- 53
- 54
- 55
- 56
- 57
- 58
- 59
- 60

- 1
- 2
- 3 27. National Health and Hospitals Reform Commission. A healthier future for all Australians:  
4 Final report. Canberra, ACT: Commonwealth of Australia, 2009.
- 5 28. Australian Institute of Health and Welfare. Australia's Health 2016. Canberra, ACT:  
6 AIHW, 2016.
- 7 29. Baum F, Freeman T, Lawless A, Jolley G. Community development - improving patient  
8 safety by enhancing the use of health services Aust. Fam. Physician 2012;**41**:424-28.
- 9 30. Labonte R. Heart health inequalities in Canada: Models, theory and planning. Health  
10 Promot. Int. 1992;**7**(2):119-27 doi: 10.1093/heapro/7.2.119.
- 11 31. Baum F, Fisher M. Why behavioural health promotion endures despite its failure to  
12 reduce health inequities. Sociol. Health Illn. 2014;**36**:213-25 doi: 10.1111/1467-  
13 9566.12112.
- 14
- 15
- 16
- 17
- 18
- 19
- 20
- 21
- 22
- 23
- 24
- 25
- 26
- 27
- 28
- 29
- 30
- 31
- 32
- 33
- 34
- 35
- 36
- 37
- 38
- 39
- 40
- 41
- 42
- 43
- 44
- 45
- 46
- 47
- 48
- 49
- 50
- 51
- 52
- 53
- 54
- 55
- 56
- 57
- 58
- 59
- 60

## FIGURE LEGENDS

Figure 1. The Southgate model for comprehensive primary health care in Australia.

Figure 2. The selective primary health care model evident in the South Australian state government-managed services in 2013.

For peer review only

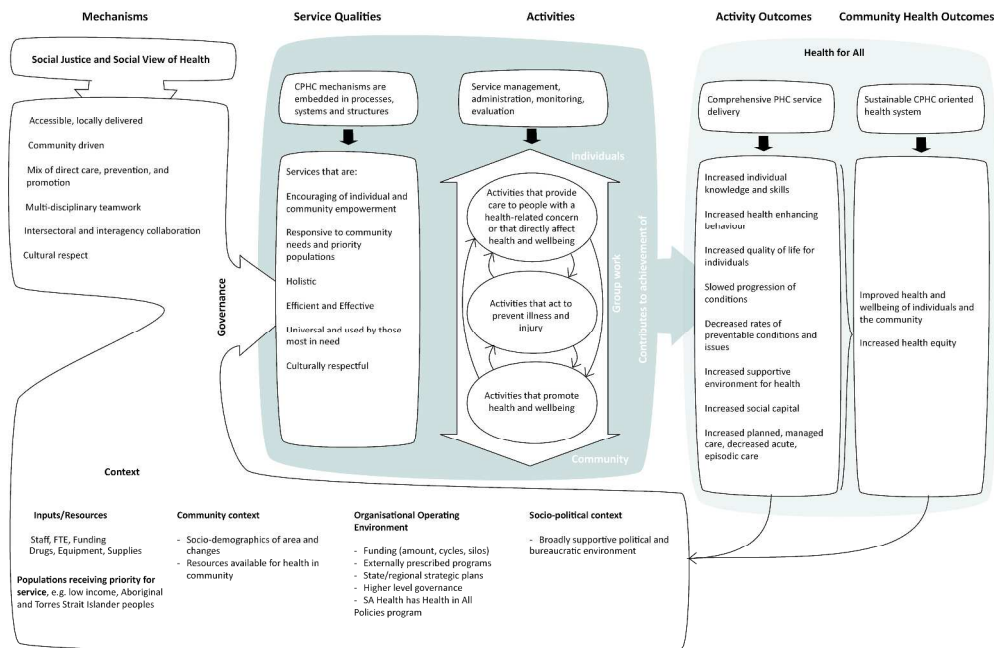

Figure 1. The Southgate model for comprehensive primary health care in Australia. Insert Figures 1 and 2 about h 417x268mm (300 x 300 DPI)

1  
2  
3  
4  
5  
6  
7  
8  
9  
10  
11  
12  
13  
14  
15  
16  
17  
18  
19  
20  
21  
22  
23  
24  
25  
26  
27  
28  
29  
30  
31  
32  
33  
34  
35  
36  
37  
38  
39  
40  
41  
42  
43  
44  
45  
46  
47  
48  
49  
50  
51  
52  
53  
54  
55  
56  
57  
58  
59  
60

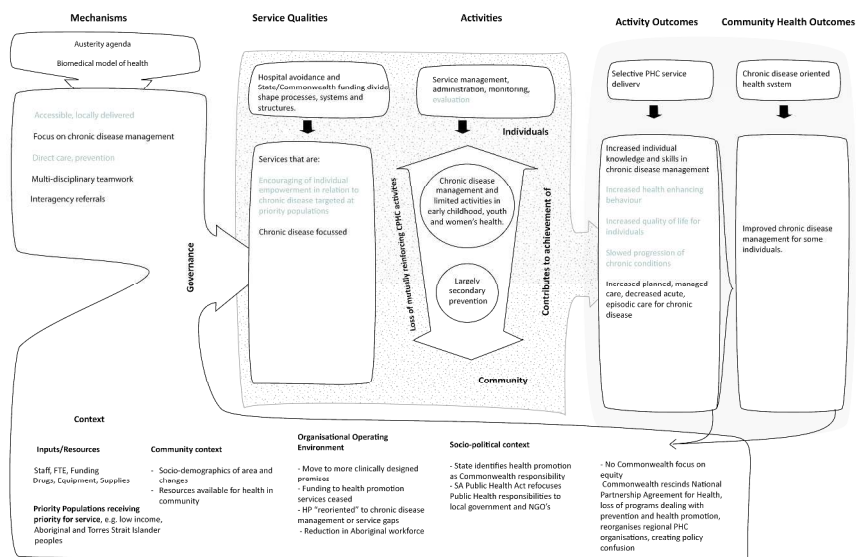

Figure 2. The selective primary health care model evident in the South Australian state government-managed services in 2013.

Insert Figures 1 and 2 about h  
486x286mm (300 x 300 DPI)

Review only
